# Supplementary material for: Waste to Medicine: Evidence from Computational Studies on the Modulatory Role of Corn Silk on the Therapeutic Targets Implicated in Type 2 Diabetes Mellitus
Source: MDPI journal article supplement (doi:10.3390/biology12121509), 2023-12-11
Supplement: s1 [file s1]

# Supplementary materials

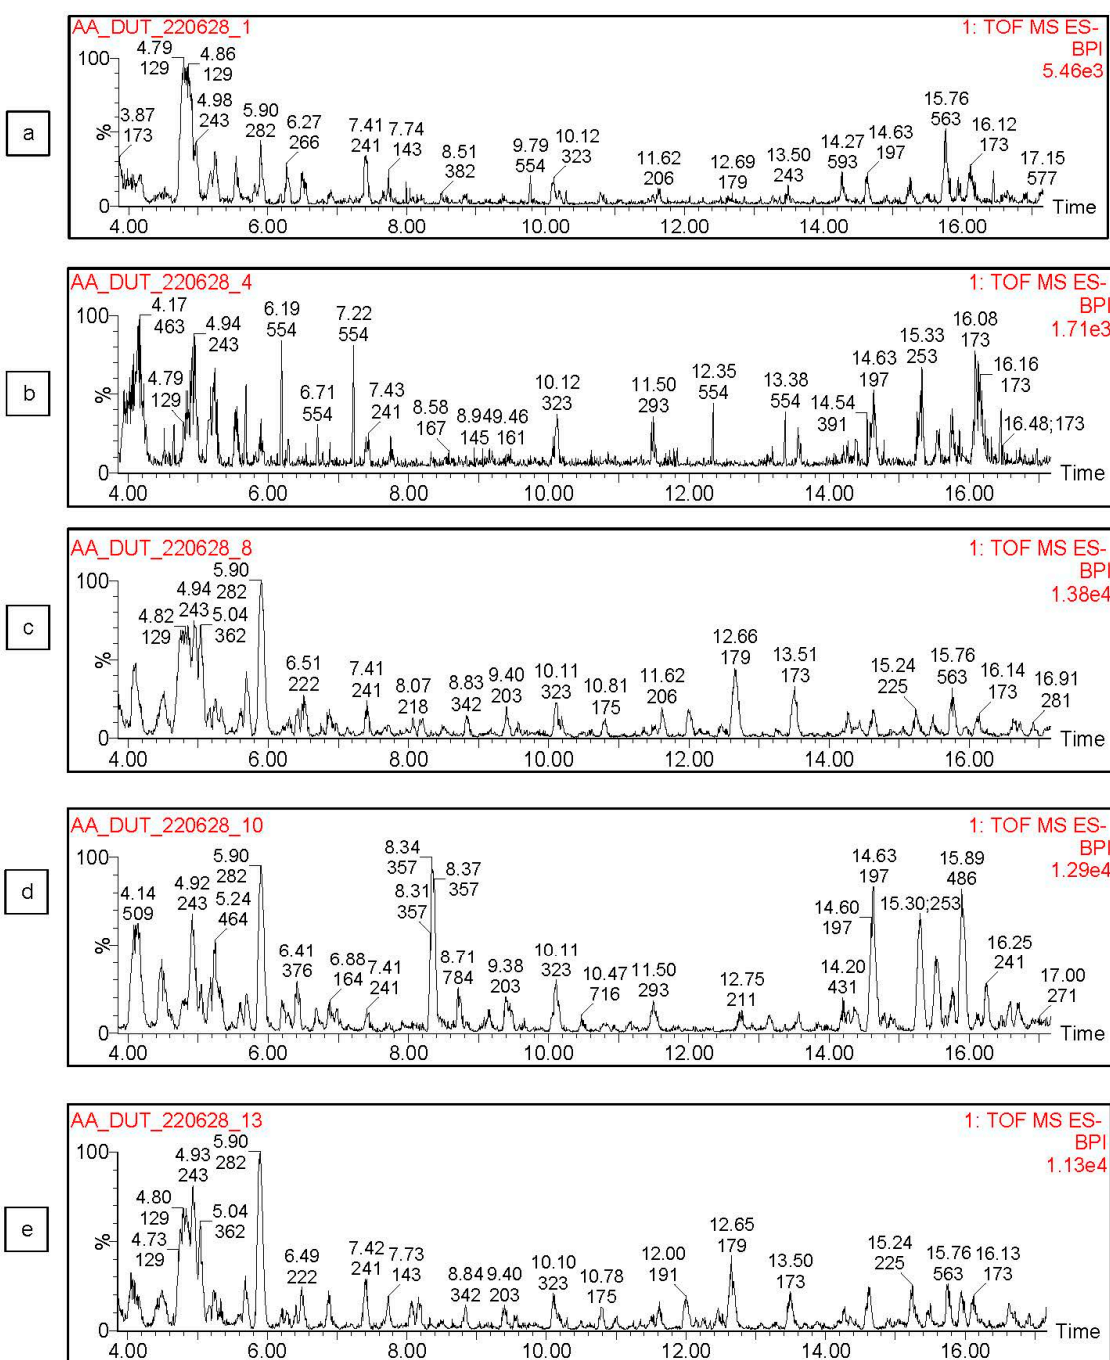

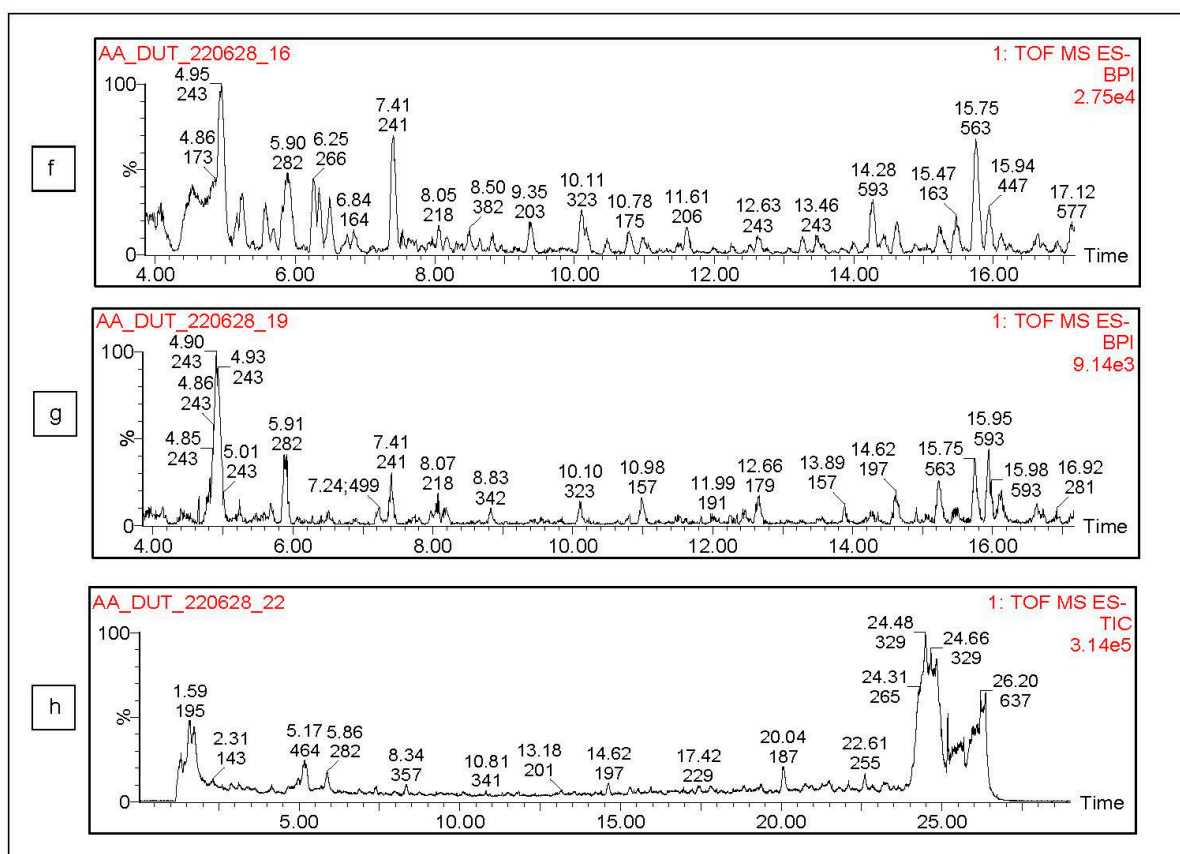

Figure S1: Examples of chromatograms produced showing mass to charge and retention times of compounds found in a) raw premature CS, b) raw mature cs as well as CS extracts; c) aqueous premature, d) aqueous mature, e) hydroethanolic premature, f) hydroethanolic mature, g) ethanolic premature and h) ethanolic mature.

Table S1: Bioactive secondary metabolites identified in various extracts of CS through UPLC-MS analysis

| Compound number | Identity                                                                                                                             | Average retention time (minute) | m/z [M - H] <sup>-</sup> |
|-----------------|--------------------------------------------------------------------------------------------------------------------------------------|---------------------------------|--------------------------|
| 1               | (7'R)-(+)-Lyoniresinol 9'-glucoside                                                                                                  | 4,071                           | 581,2203                 |
| 2               | Estriol-16-Glucuronide                                                                                                               | 4,149                           | 509,2002                 |
| 3               | Ascorbic acid                                                                                                                        | 4,307                           | 175,0235                 |
| 4               | Methylisocitric acid                                                                                                                 | 4,389                           | 205,0338                 |
| 5               | Citraconic acid                                                                                                                      | 4,524                           | 129,0178                 |
| 6               | Oxalosuccinic acid                                                                                                                   | 4,984                           | 189,0053                 |
| 7               | Pinocembrin 7-apiosyl-(1->5)-apiosyl-(1->2)-glucoside;5,7-Dihydroxyflavanone 7-apiosyl-(1->5)-apiosyl-(1->2)-glucoside               | 4,988                           | 681,2069                 |
| 8               | Mevalonic acid                                                                                                                       | 5,089                           | 147,0657                 |
| 9               | D-2-Hydroxyglutaric acid                                                                                                             | 5,176                           | 147,0287                 |
| 10              | (2R,3S)-2,3-dimethylmalic acid                                                                                                       | 5,236                           | 161,0445                 |
| 11              | UNPD109129                                                                                                                           | 6,348                           | 251,0772                 |
| 12              | Glutaric acid                                                                                                                        | 6,152                           | 131,0349                 |
| 13              | Cinnamic acid                                                                                                                        | 6,849                           | 147,0448                 |
| 14              | (6E)-1-(4-hydroxyphenyl)-7-phenylhepta-4,6-dien-3-one                                                                                | 8,452                           | 277,1251                 |
| 15              | Vanillic acid                                                                                                                        | 8,553                           | 167,0338                 |
| 16              | 1-O-vanilloyl-beta-D-glucose                                                                                                         | 8,553                           | 329,0892                 |
| 17              | Isorhamnetin 3-(6''-malonylglucoside)                                                                                                | 8,642                           | 563,1026                 |
| 18              | Saccharumoside C                                                                                                                     | 9,081                           | 461,1286                 |
| 19              | 7-hydroxy-4-{3-oxo-3H-benzo[f]chromen-2-yl}-2H-chromen-2-one                                                                         | 9,14                            | 355,0631                 |
| 20              | Sarmentose                                                                                                                           | 9,447                           | 161,0809                 |
| 21              | CNP0447999                                                                                                                           | 9,571                           | 353,084                  |
| 22              | 1-O-Caffeoylglucose                                                                                                                  | 9,75                            | 341,0882                 |
| 23              | 1-O-Galloylglycerol                                                                                                                  | 10,05                           | 243,0488                 |
| 24              | C00051555                                                                                                                            | 10,106                          | 323,1328                 |
| 25              | 3-Isopropylmalate                                                                                                                    | 10,789                          | 175,0606                 |
| 26              | Diaportinic acid                                                                                                                     | 10,819                          | 279,0534                 |
| 27              | Benzyl beta-D-glucopyranoside;(-)-Benzyl-O-beta-D-glucopyranoside                                                                    | 11,147                          | 269,103                  |
| 28              | Domesticoside                                                                                                                        | 11,354                          | 343,1013                 |
| 29              | Dihydrophaseic acid 4'-O-beta-D-glucopyranoside                                                                                      | 11,369                          | 443,1937                 |
| 30              | Ketoleucine                                                                                                                          | 11,471                          | 129,0549                 |
| 31              | Aesculin                                                                                                                             | 11,471                          | 339,0728                 |
| 32              | Chlorogenic acid                                                                                                                     | 11,997                          | 353,0874                 |
| 33              | Quinic acid                                                                                                                          | 12,004                          | 191,055                  |
| 34              | Cudraphenone A                                                                                                                       | 12,229                          | 363,1627                 |
| 35              | Pimelic acid                                                                                                                         | 12,255                          | 159,0653                 |
| 36              | (-)-6-((2S,3R,4R,5S,6R)-3,4-dihydroxy-6-(hydroxymethyl)-5-methoxytetrahydro-2H-pyran-2-yloxy)-8-hydroxy-3-methyl-1H-isochromen-1-one | 12,458                          | 367,1035                 |

|    |                                                                           |        |          |
|----|---------------------------------------------------------------------------|--------|----------|
| 37 | (-)-11-hydroxy-9,10-dihydrojasmonic acid 11-beta-D-glucoside              | 12,515 | 389,1799 |
| 38 | Caffeic acid                                                              | 12,653 | 179,0349 |
| 39 | 5-Carboxyvanillic acid                                                    | 12,729 | 211,0234 |
| 40 | Phellodendric acid A;(+)Phellodendric acid A                              | 12,754 | 203,0944 |
| 41 | (-)-Epigallocatechin                                                      | 13,267 | 305,0676 |
| 42 | D-Leucic acid                                                             | 13,289 | 131,0713 |
| 43 | cis-Aconitic acid                                                         | 13,501 | 173,0094 |
| 44 | MINEs-320976                                                              | 14,199 | 431,1909 |
| 45 | Loganic acid                                                              | 14,248 | 375,1276 |
| 46 | Astragalin 7-rhamnoside                                                   | 14,269 | 593,1522 |
| 47 | Quing hau sau; quinghaosu; artemisinin                                    | 14,353 | 281,1399 |
| 48 | 3-Hydroxy-4-butanolide                                                    | 14,432 | 263,0786 |
| 49 | Annularin A;(+)Annularin A                                                | 14,623 | 197,081  |
| 50 | Traumatic acid                                                            | 14,781 | 227,1267 |
| 51 | Methyl geranate                                                           | 14,869 | 181,1236 |
| 52 | 3-Hydroxytetradecanedioic acid                                            | 14,873 | 273,1726 |
| 53 | Dihydrophaseic acid                                                       | 14,937 | 281,1376 |
| 54 | Tuberonic acid                                                            | 15,238 | 225,1111 |
| 55 | Daldiniapyrone                                                            | 15,294 | 253,1071 |
| 56 | 4-Hydroxycinnamic acid                                                    | 15,479 | 163,0386 |
| 57 | Monascusone A                                                             | 15,536 | 253,106  |
| 58 | Acetovanillone;Apocynin                                                   | 15,596 | 165,0547 |
| 59 | Apiin                                                                     | 15,756 | 563,1376 |
| 60 | Quercitrin                                                                | 15,953 | 447,0915 |
| 61 | 2-Hydroxydecanedioic acid                                                 | 16,176 | 217,1065 |
| 62 | UNPD221406                                                                | 16,241 | 241,1083 |
| 63 | Cichorioside M;(+)Cichorioside M                                          | 16,618 | 427,1946 |
| 64 | Austricin;8-Deacetylmatricarin;Desacetylmatricarin                        | 16,714 | 261,1154 |
| 65 | trans-Ferulic acid                                                        | 17,086 | 193,0499 |
| 66 | UNPD19396                                                                 | 17,122 | 577,15   |
| 67 | UNPD77208                                                                 | 17,208 | 271,1529 |
| 68 | Nepetaside                                                                | 17,236 | 345,1552 |
| 69 | Dodecanedioic acid                                                        | 17,417 | 229,1427 |
| 70 | Kaempferitrin                                                             | 17,554 | 577,1528 |
| 71 | Chrysoeriol 4',7-diglucuronide                                            | 17,675 | 651,118  |
| 72 | erythronolide B                                                           | 17,734 | 401,2548 |
| 73 | UNPD230015                                                                | 17,818 | 263,0574 |
| 74 | 3-Hydroxysebacic acid                                                     | 17,836 | 217,106  |
| 75 | Tricin 7-diglucuronoside                                                  | 17,958 | 681,1317 |
| 76 | Esculetin                                                                 | 18,079 | 177,0172 |
| 77 | ethyl 5-[(2,5-dimethylphenyl)methoxy]-2-phenyl-1-benzofuran-3-carboxylate | 18,087 | 399,1613 |
| 78 | xi-2,2,6-Trimethyl-1,4-cyclohexanedione                                   | 18,254 | 153,0928 |
| 79 | Quercetin 3-(2'',3'',4''-triacylgalactoside)                              | 18,307 | 589,1204 |
| 80 | [4]-Gingerol                                                              | 18,844 | 265,1428 |
| 81 | Phaseic acid                                                              | 18,558 | 279,1234 |
| 82 | Diaportinol                                                               | 18,603 | 265,0729 |
| 83 | Herbacetin 7-(6''-quinoylglucoside)                                       | 18,677 | 637,1406 |

|     |                                                                               |        |          |
|-----|-------------------------------------------------------------------------------|--------|----------|
| 84  | 12-deoxyerythronolide A                                                       | 19,046 | 401,253  |
| 85  | UNPD156113                                                                    | 19,094 | 605,1201 |
| 86  | Mirificin                                                                     | 19,148 | 547,1448 |
| 87  | Phaseolic acid                                                                | 19,244 | 261,1326 |
| 88  | Curvularol                                                                    | 19,367 | 265,1433 |
| 89  | (+)-(S)-Carvone                                                               | 19,645 | 149,0958 |
| 90  | Kaempferol 3-rhamnoside 7-galacturonide                                       | 19,868 | 607,1331 |
| 91  | Azelaic acid                                                                  | 20,074 | 187,0968 |
| 92  | Kaempferol 3-rhamnoside 7-galacturonide                                       | 20,286 | 607,1347 |
| 93  | Stagonolide F;(-)-Stagonolide F                                               | 20,677 | 183,1045 |
| 94  | Isowertin 2''-rhamnoside                                                      | 20,732 | 1183,344 |
| 95  | UNPD223815                                                                    | 20,864 | 255,1598 |
| 96  | 9-hydroxynonanoic acid                                                        | 20,885 | 173,1173 |
| 97  | Maysin                                                                        | 20,941 | 1151,286 |
| 98  | 5,7,4'-Trihydroxy-3'-methoxyflavone; Luteolin 3'-methyl ether 7-glucuronide   | 21,005 | 475,085  |
| 99  | Quercetin 3-O-(6''-acetyl-glucoside)                                          | 21,144 | 505,0988 |
| 100 | Blennin D                                                                     | 21,154 | 265,1425 |
| 101 | 10-Deoxygeniposidic acid                                                      | 21,271 | 357,1225 |
| 102 | Gallicynoic acid F;(-)-Gallicynoic acid F                                     | 21,409 | 343,2093 |
| 103 | Pandangolide 1a;(-)-Pandangolide 1a                                           | 21,459 | 243,1215 |
| 104 | 4-Hydroxynonenal                                                              | 21,569 | 155,1078 |
| 105 | Tetradecanedioic acid                                                         | 21,764 | 257,1747 |
| 106 | (R)-7-butyl-6,8-dihydroxy-3-[(3E)-pent-3-en-1-yl]-3,4-dihydroisochromen-1-one | 21,818 | 303,1627 |
| 107 | Genistin                                                                      | 21,815 | 431,0959 |
| 108 | p-Coumaroyl malic acid                                                        | 20,852 | 282,1126 |
| 109 | Kaempferol 3-[2'''-acetyl-alpha-L-arabinopyranosyl-(1->6)-galactoside]        | 21,942 | 621,1427 |
| 110 | Cyperine                                                                      | 22,091 | 259,0962 |
| 111 | (+)-Cnicin; Cnicin                                                            | 22,111 | 377,1621 |
| 112 | (S)-Absciscic acid                                                            | 22,202 | 263,1284 |
| 113 | Sydnic acid; Sydonic acid                                                     | 22,233 | 265,1424 |
| 114 | Gallicynoic acid A;(+)Gallicynoic acid A                                      | 22,806 | 253,1445 |
| 115 | Apigenin 7-O-(6''-O-acetylglucoside)                                          | 22,847 | 473,1057 |
| 116 | UNPD127537                                                                    | 23,18  | 255,1597 |
| 117 | Olivetol                                                                      | 23,205 | 179,1065 |
| 118 | Ginsenoyn E                                                                   | 23,293 | 303,1604 |
| 119 | Caffeoyl tartaric acid                                                        | 23,326 | 312,1225 |
| 120 | Luteolin 3'-methyl ether 7-glucuronide                                        | 23,476 | 265,1425 |
| 121 | UNPD205010                                                                    | 23,478 | 343,1748 |
| 122 | Maysin 3'-methyl ether                                                        | 23,505 | 589,1541 |
| 123 | Artemin                                                                       | 23,657 | 265,1458 |
| 124 | Gallicynoic acid B                                                            | 23,687 | 267,159  |
| 125 | Aspergillide A                                                                | 23,804 | 253,1443 |
| 126 | (S)-Oleuropeic acid                                                           | 23,889 | 183,1018 |
| 127 | Sebacic acid                                                                  | 23,894 | 201,1113 |
| 128 | 7-Acetoxy-5,6-dimethoxycoumarin                                               | 17,818 | 263,0574 |

a

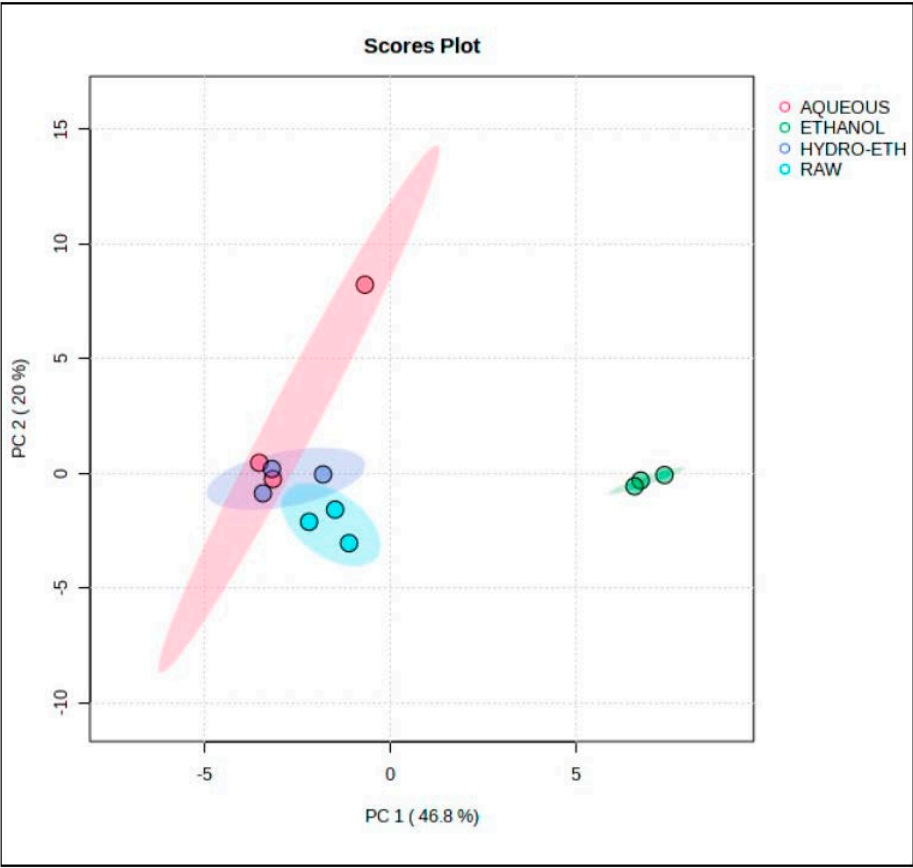

b

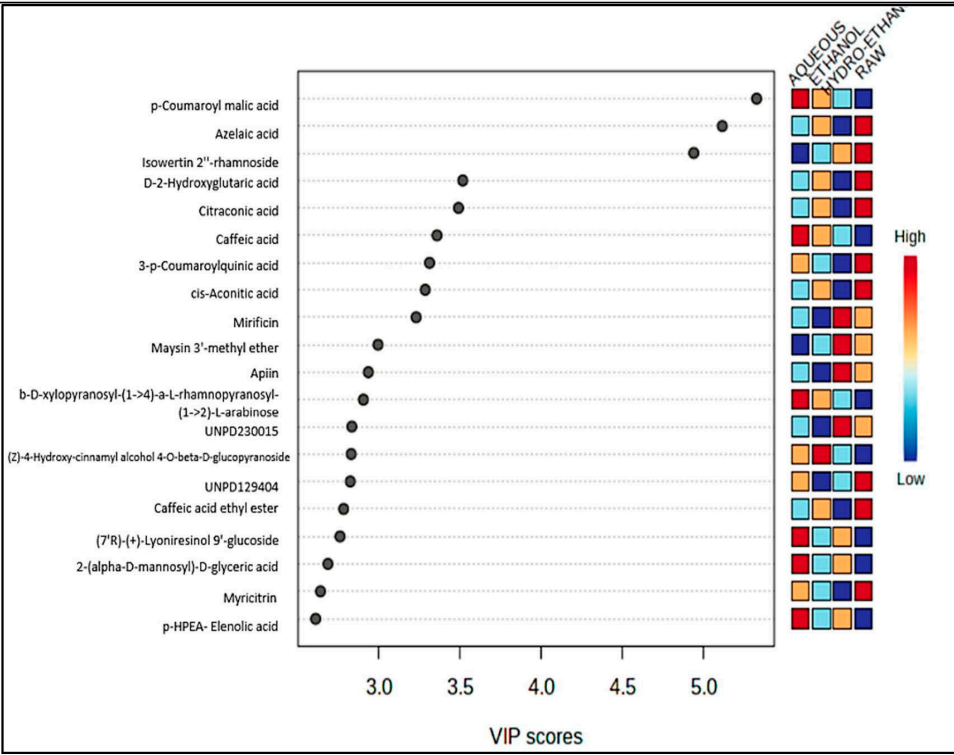

Figure S2: a) Principal component analysis scores plot showing variance in CS secondary metabolites between the four extracts; b) Partial least square discriminant analysis (PLS-DA) loadings plot showing the differences in the amount of secondary metabolites present in the four samples of CS.

Table S2: Number of Lipinski's violations of CS bioactive compounds

|    | Formula   | Molecular weight (g/mol) | #H-bond acceptors | #H-bond donors | iLOGP (octanol/water partition coefficient) | Lipinski #violations |
|----|-----------|--------------------------|-------------------|----------------|---------------------------------------------|----------------------|
| 1  | C28H38O13 | 582.59                   | 13                | 7              | 4.71                                        | 3                    |
| 2  | C24H32O9  | 464.51                   | 9                 | 6              | 1.67                                        | 1                    |
| 3  | C6H8O6    | 176.12                   | 6                 | 4              | 0.39                                        | 0                    |
| 4  | C7H10O7   | 206.15                   | 7                 | 4              | -0.94                                       | 0                    |
| 5  | C5H6O4    | 130.10                   | 4                 | 2              | 0.46                                        | 0                    |
| 6  | C6H6O7    | 190.11                   | 7                 | 3              | -0.71                                       | 0                    |
| 7  | C31H38O17 | 682.62                   | 17                | 9              | 2.27                                        | 3                    |
| 8  | C6H12O4   | 148.16                   | 4                 | 3              | 0.39                                        | 0                    |
| 9  | C5H8O5    | 148.11                   | 5                 | 3              | 0.18                                        | 0                    |
| 10 | C6H10O5   | 162.14                   | 5                 | 3              | 0.34                                        | 0                    |
| 11 | C9H16O8   | 252.22                   | 8                 | 5              | 0.37                                        | 0                    |
| 12 | C5H8O4    | 132.11                   | 4                 | 2              | 0.45                                        | 0                    |
| 13 | C9H8O2    | 148.16                   | 2                 | 1              | 1.55                                        | 0                    |
| 14 | C19H18O2  | 278.35                   | 2                 | 1              | 2.79                                        | 0                    |
| 15 | C8H8O4    | 168.15                   | 4                 | 2              | 1.40                                        | 0                    |
| 16 | C14H18O9  | 330.29                   | 9                 | 5              | 1.88                                        | 0                    |
| 17 | C25H24O15 | 564.45                   | 15                | 7              | 1.77                                        | 3                    |
| 18 | C19H26O13 | 462.40                   | 13                | 7              | 1.35                                        | 2                    |
| 19 | C22H12O5  | 356.33                   | 5                 | 1              | 2.52                                        | 0                    |
| 20 | C7H14O4   | 162.18                   | 4                 | 2              | 0.94                                        | 0                    |
| 21 | C23H14O4  | 354.35                   | 4                 | 1              | 2.41                                        | 0                    |
| 22 | C15H18O9  | 342.30                   | 9                 | 6              | 0.23                                        | 1                    |
| 23 | C10H12O7  | 244.20                   | 7                 | 5              | 0.63                                        | 0                    |
| 24 | C13H24O9  | 324.32                   | 9                 | 5              | 1.95                                        | 0                    |
| 25 | C7H12O5   | 176.17                   | 5                 | 3              | 0.24                                        | 0                    |
| 26 | C13H12O7  | 280.23                   | 7                 | 3              | 1.54                                        | 0                    |
| 27 | C13H18O6  | 270.28                   | 6                 | 4              | 1.60                                        | 0                    |
| 28 | C15H20O9  | 344.31                   | 9                 | 5              | 2.05                                        | 0                    |
| 29 | C21H32O10 | 444.47                   | 10                | 6              | 1.89                                        | 1                    |
| 30 | C6H10O3   | 130.14                   | 3                 | 1              | 1.06                                        | 0                    |
| 31 | C15H16O9  | 340.28                   | 9                 | 5              | 1.04                                        | 0                    |
| 32 | C16H18O9  | 354.31                   | 9                 | 6              | 0.96                                        | 1                    |
| 33 | C7H12O6   | 192.17                   | 6                 | 5              | -0.12                                       | 0                    |
| 34 | C23H24O4  | 364.43                   | 4                 | 2              | 3.70                                        | 0                    |
| 35 | C7H12O4   | 160.17                   | 4                 | 2              | 0.94                                        | 0                    |
| 36 | C17H20O9  | 368.34                   | 9                 | 4              | 2.54                                        | 0                    |
| 37 | C18H30O9  | 390.43                   | 9                 | 5              | 2.35                                        | 0                    |
| 38 | C9H8O4    | 180.16                   | 4                 | 3              | 0.97                                        | 0                    |
| 39 | C9H8O6    | 212.16                   | 6                 | 3              | 0.24                                        | 0                    |
| 40 | C9H16O5   | 204.22                   | 5                 | 2              | 1.55                                        | 0                    |
| 41 | C15H14O7  | 306.27                   | 7                 | 6              | 0.98                                        | 1                    |
| 42 | C6H12O3   | 132.16                   | 3                 | 2              | 1.17                                        | 0                    |

|    |           |        |    |    |       |   |
|----|-----------|--------|----|----|-------|---|
| 43 | C6H6O6    | 174.11 | 6  | 3  | -0.13 | 0 |
| 44 | C20H32O10 | 432.46 | 10 | 6  | 1.57  | 1 |
| 45 | C16H24O10 | 376.36 | 10 | 6  | 1.26  | 1 |
| 46 | C27H30O15 | 594.52 | 15 | 9  | 1.80  | 3 |
| 47 | C15H22O5  | 282.33 | 5  | 0  | 2.75  | 0 |
| 48 | C10H16O8  | 264.23 | 8  | 4  | 0.97  | 0 |
| 49 | C10H14O4  | 198.22 | 4  | 1  | 2.32  | 0 |
| 50 | C12H20O4  | 228.28 | 4  | 2  | 2.04  | 0 |
| 51 | C11H18O2  | 182.26 | 2  | 0  | 3.05  | 0 |
| 52 | C14H26O5  | 274.35 | 5  | 3  | 2.34  | 0 |
| 53 | C15H22O5  | 282.33 | 5  | 3  | 2.09  | 0 |
| 54 | C12H18O4  | 226.27 | 4  | 2  | 1.46  | 0 |
| 55 | C13H18O5  | 254.28 | 5  | 0  | 3.07  | 0 |
| 56 | C9H8O3    | 164.16 | 3  | 2  | 0.95  | 0 |
| 57 | C13H18O5  | 254.28 | 5  | 3  | 1.82  | 0 |
| 58 | C9H10O3   | 166.17 | 3  | 1  | 1.77  | 0 |
| 59 | C26H28O14 | 564.49 | 14 | 8  | 2.11  | 3 |
| 60 | C21H20O11 | 448.38 | 11 | 7  | 1.27  | 2 |
| 61 | C10H18O5  | 218.25 | 5  | 3  | 0.96  | 0 |
| 62 | C12H18O5  | 242.27 | 5  | 2  | 1.81  | 0 |
| 63 | C21H32O9  | 428.47 | 9  | 5  | 1.97  | 0 |
| 64 | C15H18O4  | 262.30 | 4  | 1  | 2.03  | 0 |
| 65 | C10H10O4  | 194.18 | 4  | 2  | 1.62  | 0 |
| 66 | C34H26O9  | 578.56 | 9  | 6  | 3.45  | 2 |
| 67 | C14H24O5  | 272.34 | 5  | 1  | 2.71  | 0 |
| 68 | C16H26O8  | 346.37 | 8  | 4  | 2.06  | 0 |
| 69 | C12H22O4  | 230.30 | 4  | 2  | 1.83  | 0 |
| 70 | C27H30O14 | 578.52 | 14 | 8  | 1.89  | 3 |
| 71 | C28H28O18 | 652.51 | 18 | 9  | 0.94  | 3 |
| 72 | C21H38O7  | 402.52 | 7  | 4  | 2.83  | 0 |
| 73 | C13H12O6  | 264.23 | 6  | 3  | 1.70  | 0 |
| 74 | C10H18O5  | 218.25 | 5  | 3  | 1.32  | 0 |
| 75 | C29H30O19 | 682.54 | 19 | 9  | 1.95  | 3 |
| 76 | C9H6O4    | 178.14 | 4  | 2  | 1.25  | 0 |
| 77 | C26H24O4  | 400.47 | 4  | 0  | 4.45  | 1 |
| 78 | C9H14O2   | 154.21 | 2  | 0  | 1.63  | 0 |
| 79 | C27H26O15 | 590.49 | 15 | 5  | 1.94  | 2 |
| 80 | C15H22O4  | 266.33 | 4  | 2  | 2.38  | 0 |
| 81 | C15H20O5  | 280.32 | 5  | 2  | 1.76  | 0 |
| 82 | C13H14O6  | 266.25 | 6  | 3  | 2.33  | 0 |
| 83 | C28H30O17 | 638.53 | 17 | 11 | 1.81  | 3 |
| 84 | C21H38O7  | 402.52 | 7  | 4  | 2.83  | 0 |
| 85 | C27H26O16 | 606.49 | 16 | 9  | 2.59  | 3 |
| 86 | C26H28O13 | 548.49 | 13 | 8  | 0.66  | 3 |
| 87 | C12H22O6  | 262.30 | 6  | 4  | 1.32  | 0 |
| 88 | C15H22O4  | 266.33 | 4  | 2  | 2.35  | 0 |
| 89 | C10H14O   | 150.22 | 1  | 0  | 2.27  | 0 |
| 90 | C27H28O16 | 608.50 | 16 | 9  | 1.66  | 3 |
| 91 | C9H16O4   | 188.22 | 4  | 2  | 1.44  | 0 |
| 92 | C27H28O16 | 608.50 | 16 | 9  | 1.66  | 3 |
| 93 | C10H16O3  | 184.23 | 3  | 1  | 2.03  | 0 |
| 94 | C28H32O14 | 592.55 | 14 | 8  | 0.80  | 3 |
| 95 | C14H24O4  | 256.34 | 4  | 1  | 3.26  | 0 |
| 96 | C9H18O3   | 174.24 | 3  | 2  | 1.83  | 0 |



|     |           |        |    |   |      |   |
|-----|-----------|--------|----|---|------|---|
| 97  | C27H28O14 | 576.50 | 14 | 8 | 1.95 | 3 |
| 98  | C22H20O12 | 476.39 | 12 | 6 | 2.02 | 2 |
| 99  | C23H22O13 | 506.41 | 13 | 7 | 1.61 | 3 |
| 100 | C15H22O4  | 266.33 | 4  | 2 | 2.46 | 0 |
| 101 | C16H22O9  | 358.34 | 9  | 5 | 1.24 | 0 |
| 102 | C18H32O6  | 344.44 | 6  | 5 | 2.95 | 0 |
| 103 | C12H20O5  | 244.28 | 5  | 2 | 1.91 | 0 |
| 104 | C9H16O2   | 156.22 | 2  | 1 | 2.15 | 0 |
| 105 | C14H26O4  | 258.35 | 4  | 2 | 2.49 | 0 |
| 106 | C18H24O4  | 304.38 | 4  | 2 | 3.45 | 0 |
| 107 | C21H20O10 | 432.38 | 10 | 6 | 2.11 | 1 |
| 108 | C13H12O7  | 280.23 | 7  | 3 | 0.62 | 0 |
| 109 | C28H30O16 | 622.53 | 16 | 8 | 1.81 | 3 |
| 110 | C15H16O4  | 260.29 | 4  | 2 | 2.73 | 0 |
| 111 | C20H26O7  | 378.42 | 7  | 3 | 1.97 | 0 |
| 112 | C15H20O4  | 264.32 | 4  | 2 | 1.97 | 0 |
| 113 | C15H22O4  | 266.33 | 4  | 3 | 2.59 | 0 |
| 114 | C14H22O4  | 254.32 | 4  | 3 | 2.19 | 0 |
| 115 | C23H22O11 | 474.41 | 11 | 5 | 2.31 | 1 |
| 116 | C14H24O4  | 256.34 | 4  | 2 | 2.66 | 0 |
| 117 | C11H16O2  | 180.24 | 2  | 2 | 2.04 | 0 |
| 118 | C17H22O2  | 258.36 | 2  | 0 | 4.10 | 0 |
| 119 | C13H12O9  | 312.23 | 9  | 5 | 0.55 | 0 |
| 120 | C28H30O16 | 622.50 | 4  | 3 | 2.59 | 1 |
| 121 | C17H28O7  | 344.40 | 7  | 2 | 2.59 | 0 |
| 122 | C28H30O14 | 590.53 | 14 | 7 | 1.76 | 3 |
| 123 | C15H22O4  | 266.33 | 4  | 2 | 2.19 | 0 |
| 124 | C15H24O4  | 268.35 | 4  | 3 | 2.87 | 0 |
| 125 | C14H22O4  | 254.32 | 4  | 1 | 2.59 | 0 |
| 126 | C10H16O3  | 184.23 | 3  | 2 | 1.65 | 0 |
| 127 | C10H18O4  | 202.25 | 4  | 2 | 1.77 | 0 |
| 128 | C13H12O6  | 264.23 | 6  | 3 | 1.70 | 1 |

Table S3: Frontier molecular orbitals for the top-scoring compounds against ADORA1, HCAR2, GABBR1

| Compound | Frontier molecular orbital |
|----------|----------------------------|
| ADORA1   |                            |

Cyperine

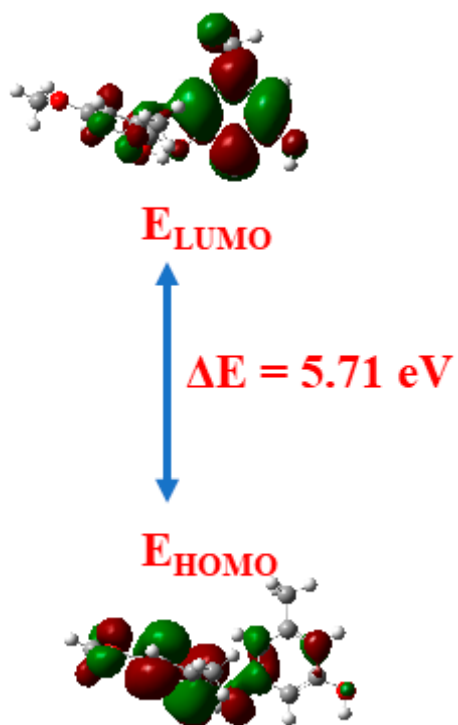

Domesticoside

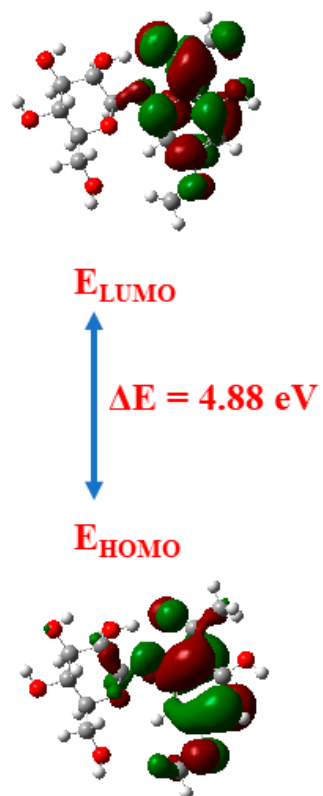

Gallicynoic acid B

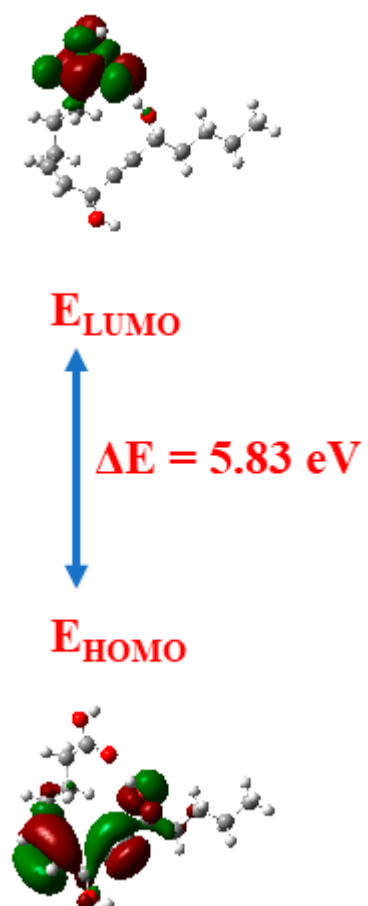

Ginsenoyne E

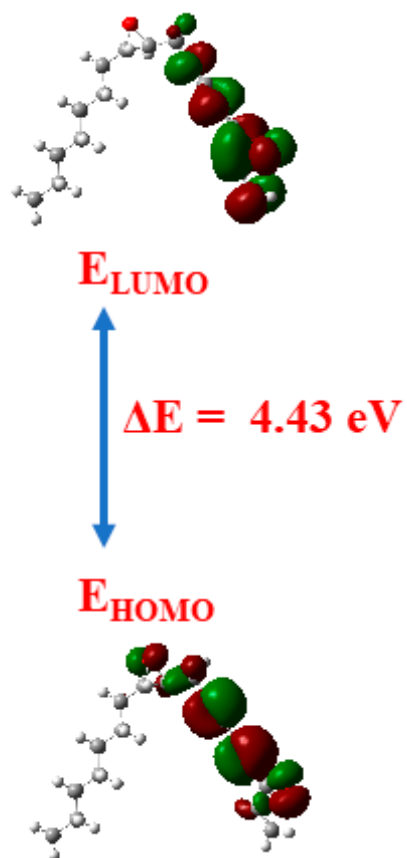

Quing hau sau

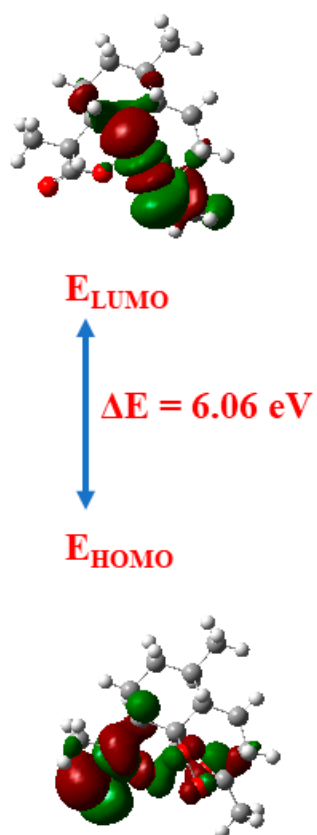

Metformin

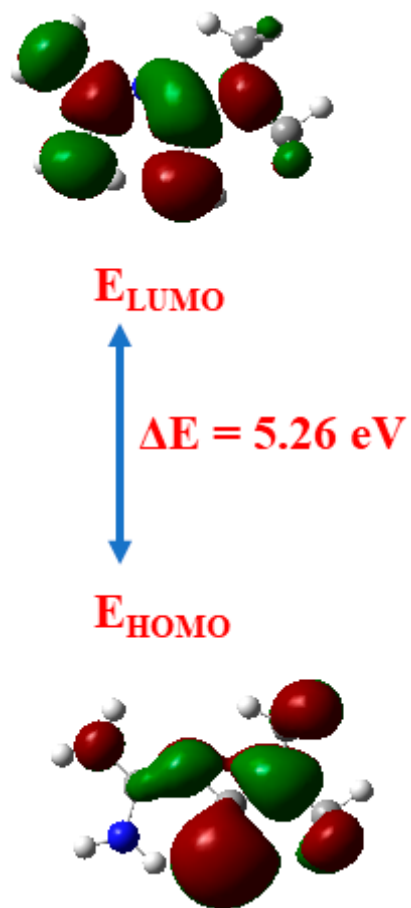

Reservatrol

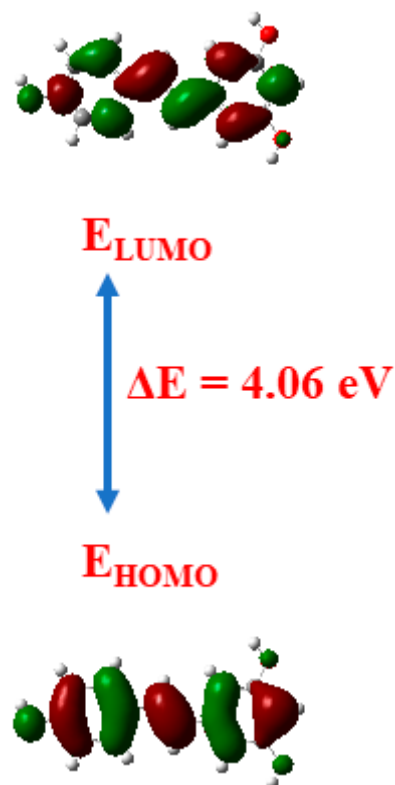

## HCAR2

Caffeic acid

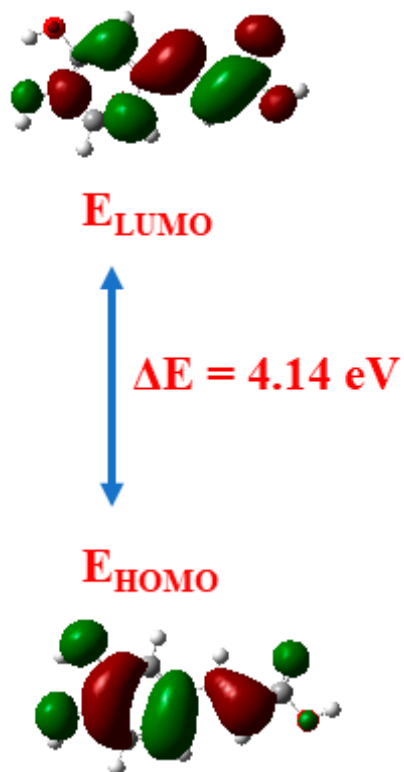

Dodecanedioc acid

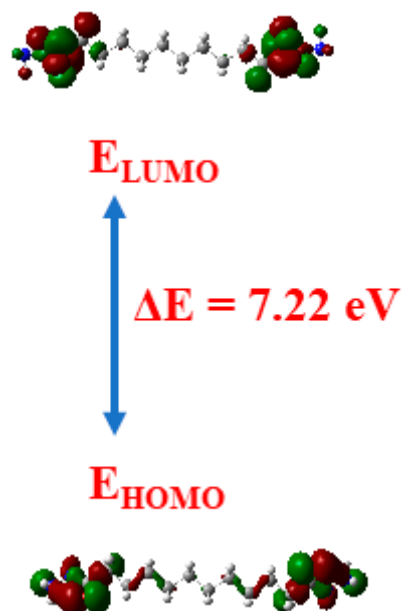

4-Hydroxycinnamic acid

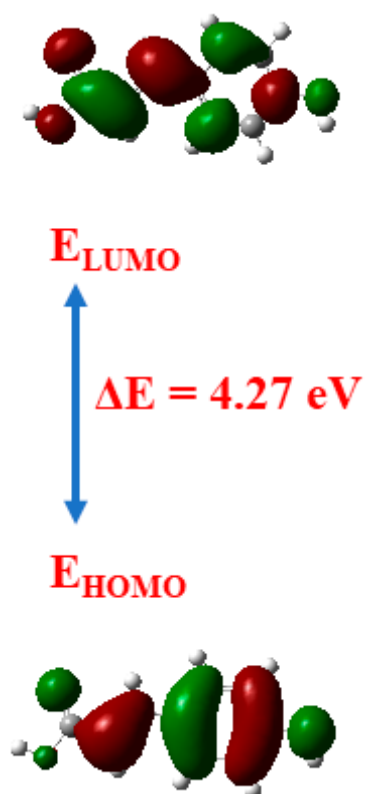

Phaseic acid

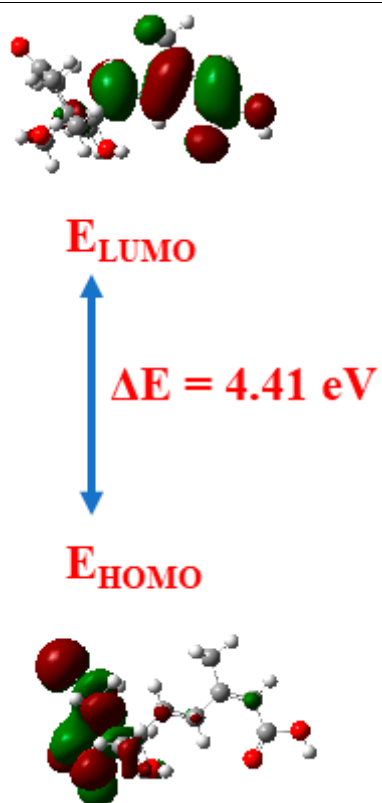

Sebaic acid

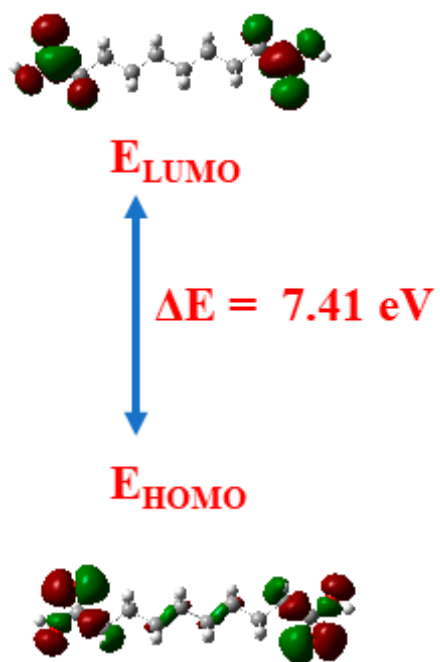

Metformin

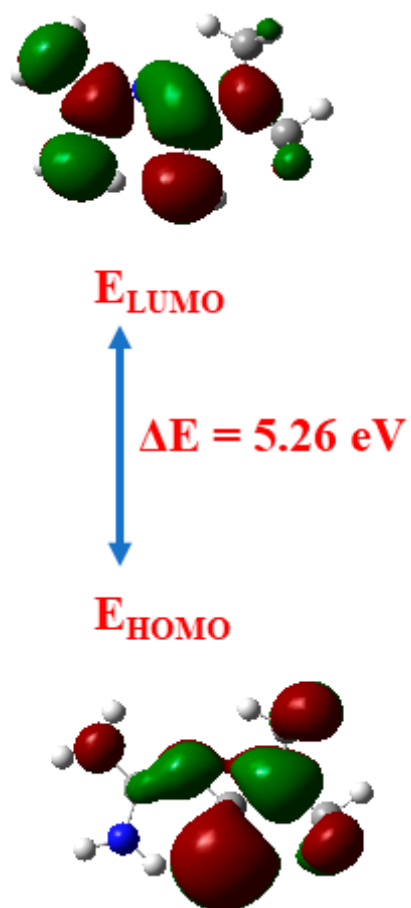



Reservatrol

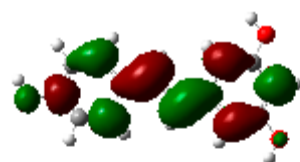

$E_{\text{LUMO}}$

$\Delta E = 4.06 \text{ eV}$

$E_{\text{HOMO}}$

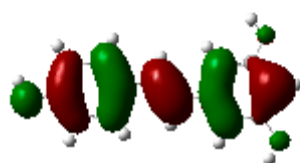

GABBR1

Dodecanedioic acid

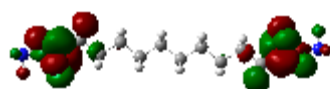

$E_{\text{LUMO}}$

$\Delta E = 7.22 \text{ eV}$

$E_{\text{HOMO}}$

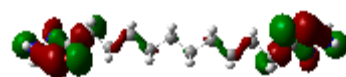

Methylisocitric acid

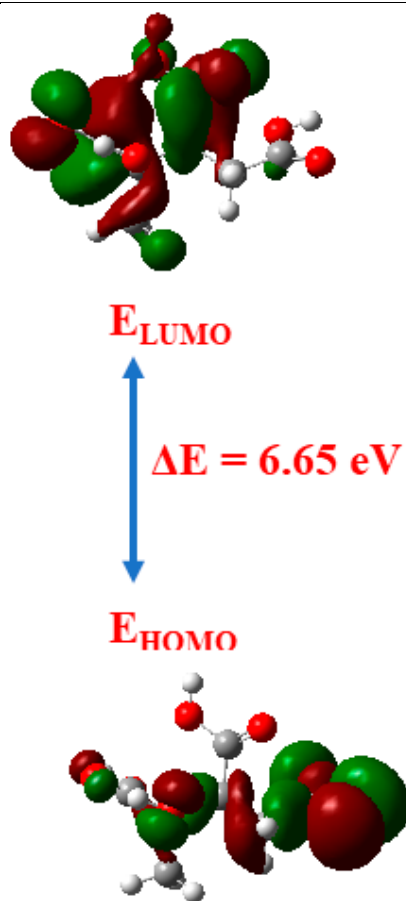

Quinic acid

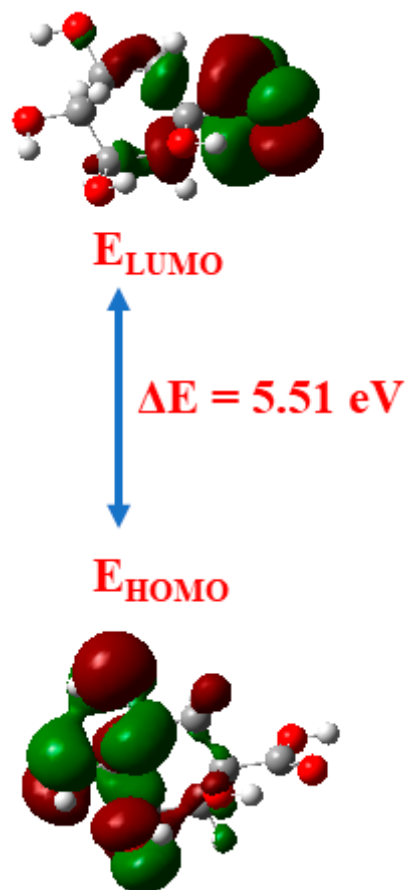

Tetradecanedioic acid

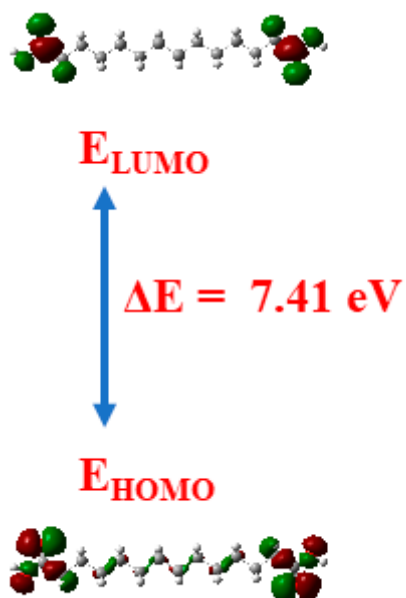

Xi-2,2,6-Trimethyl-1,4-Cyclohexanedione

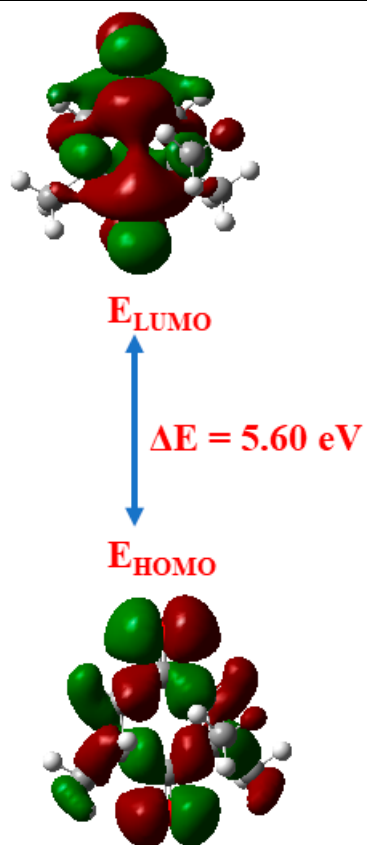

Metformin



Reservatrol

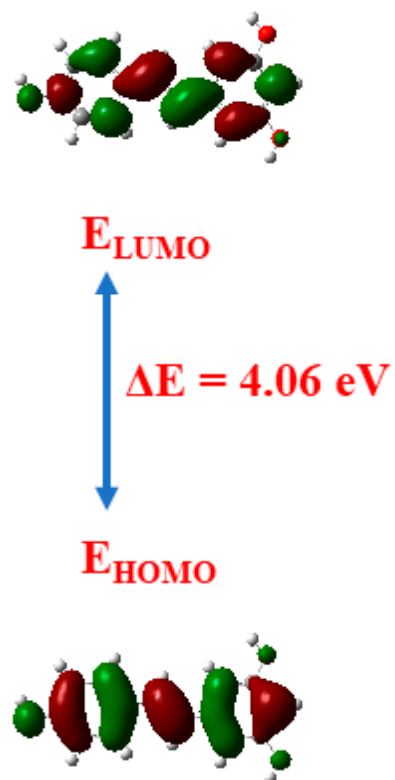



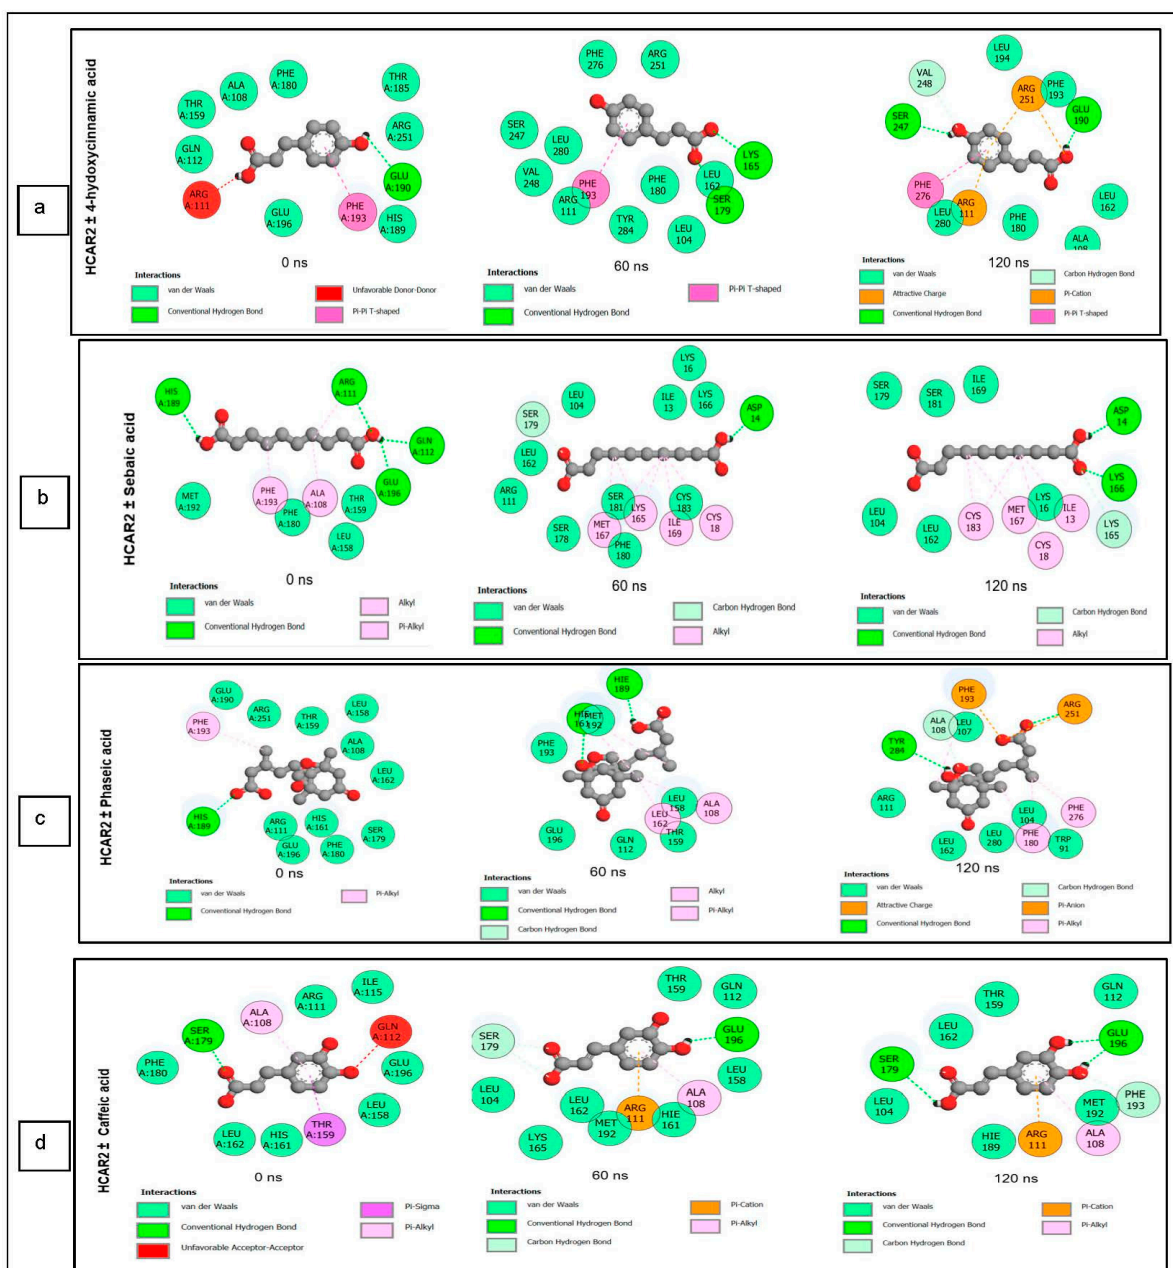

Figure S4: 2-D interaction plots of target gene HCAR2 with bioactive constituents present in CS: a) 4-hydroxycinnamic acid, b) sebaic acid, c) phaseic acid and d) caffeic acid over a 120 ns simulation

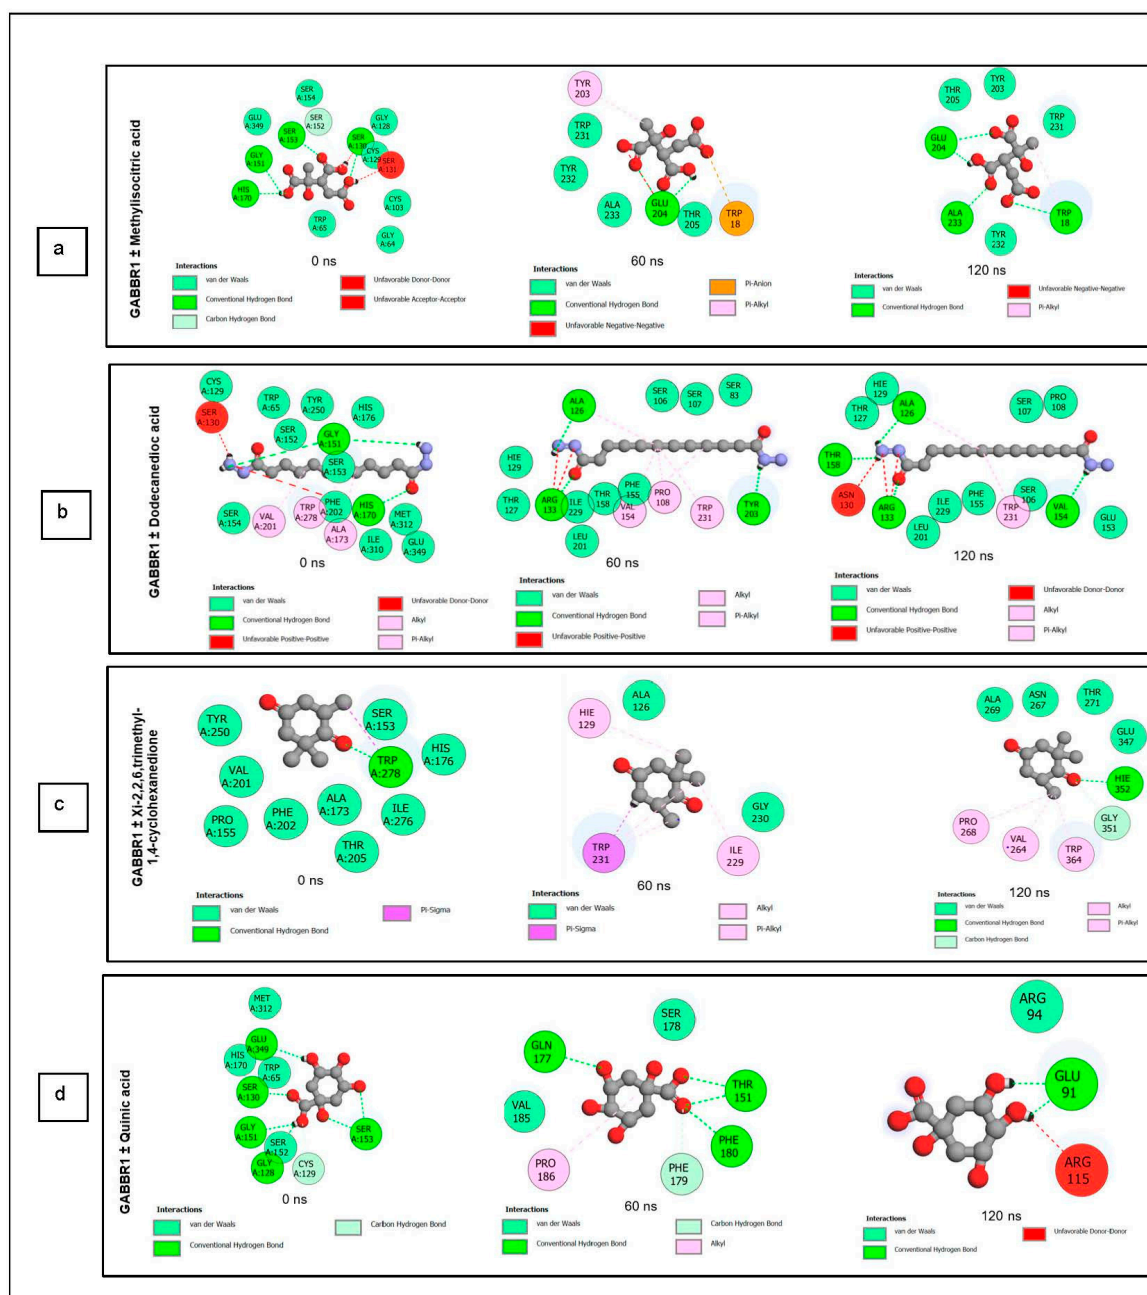

Figure S5: 2-D interaction plots of target gene GABBR1 with bioactive constituents present in CS: a) methylisocitric acid, b) dodecanedioic acid, c) xi-2,2,6,trimethyl-1,4-cyclohexanedione and d) quinic acid, over a 120 ns simulation.
